# Supplementary material for: Photoreduction of CO2 to methanol with hexanuclear molybdenum [Mo6Br14]2− cluster units under visible light irradiation
Source: Royal Society of Chemistry journal article supplement (doi:10.1039/c3ra47255h), 2014-01-01

## Supporting information

### Photoreduction of CO<sub>2</sub> to methanol with hexanuclear molybdenum [Mo<sub>6</sub>Br<sub>14</sub>]<sup>2-</sup> cluster units under visible light irradiation

Pawan Kumar<sup>a</sup>, Subodh Kumar<sup>a</sup>, Stéphane Cordier<sup>b</sup>, Serge Paofai<sup>b</sup>, Rabah Boukherroub<sup>c\*</sup> and Suman L. Jain<sup>a\*</sup>

<sup>a</sup> Chemical Sciences Division, CSIR-Indian Institute of Petroleum, Dehradun-248005, India; Tel.: +91-135-2525788; Fax: +91-135-2660202; Email: [suman@iip.res.in](mailto:suman@iip.res.in)

<sup>b</sup> Université de Rennes 1, Institut Sciences Chimiques de Rennes, URI-CNRS 6226, Equipe Chimie du Solide et Matériaux, Campus de Beaulieu, CS 74205, 35042 Rennes Cedex, France

<sup>c</sup> Institut de Recherche Interdisciplinaire (IRI, USR CNRS 3078), Université Lille 1, Parc de la Haute Borne, 50 Avenue de Halley, BP 70478, 59658 Villeneuve d'Ascq, France

**Fig. S1:** GC chromatogram of reaction product after 12 h of photoreduction of CO<sub>2</sub> using Cs<sub>2</sub>[Mo<sub>6</sub>Br<sub>8</sub>] cluster as catalyst, and DMF/H<sub>2</sub>O/TEA (3:1:1) as reaction medium.

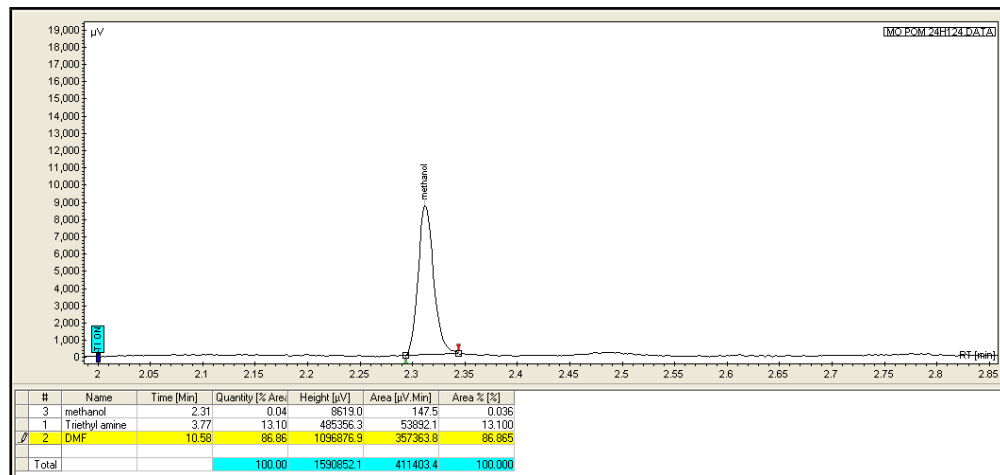

**Fig. S2:** GC-MS spectra of the reaction product after 12 h of photoreduction of CO<sub>2</sub> using Cs<sub>2</sub>[Mo<sub>6</sub>Br<sub>8</sub>] cluster as catalyst and DMF/H<sub>2</sub>O/TEA (3:1:1) as reaction medium.

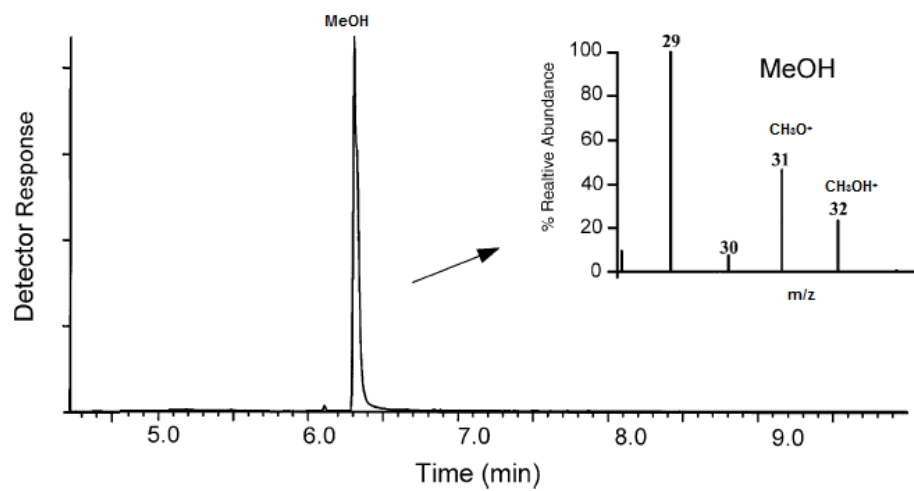

**Fig. S3:** HPLC chromatogram of the reaction product after 12 h of photoreduction of CO<sub>2</sub> using Cs<sub>2</sub>[Mo<sub>6</sub>Br<sub>8</sub>] cluster as catalyst and DMF/H<sub>2</sub>O/TEA (3:1:1) as reaction medium.

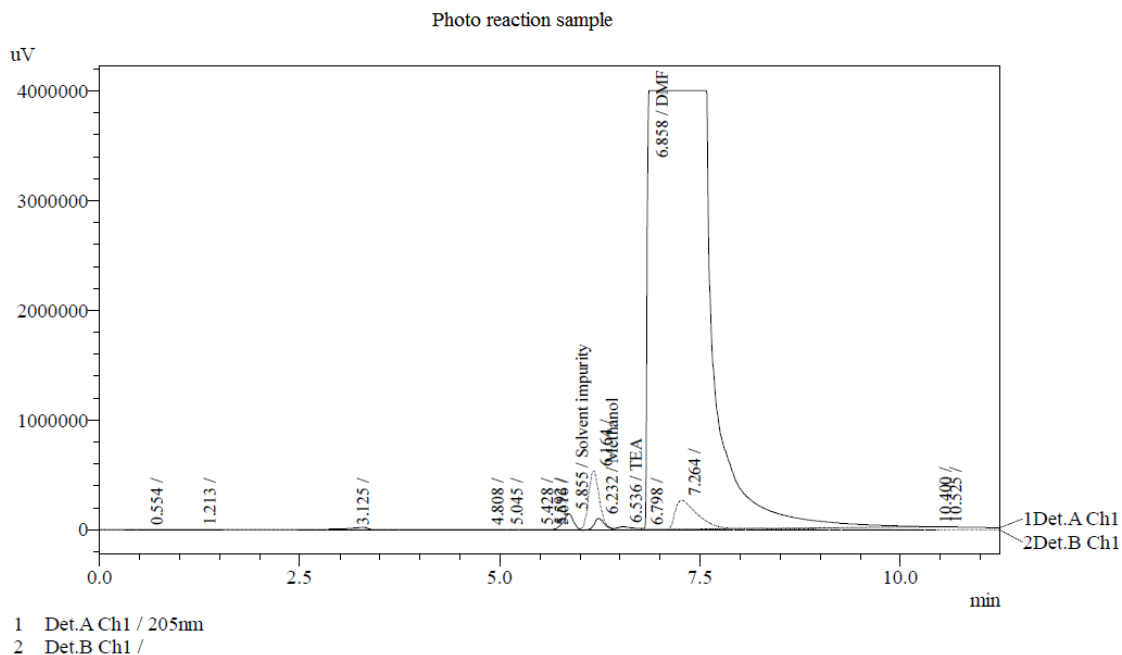

## Results

PeakTable

Detector A Ch1 205nm

| Peak# | Ret. Time | Area      | Height  | Area %  | Height % |
|-------|-----------|-----------|---------|---------|----------|
| 1     | 5.592     | -16409    | -30     | -0.008  | -0.001   |
| 2     | 5.855     | 1259415   | 146155  | 0.577   | 3.419    |
| 3     | 6.232     | 894177    | 104106  | 0.409   | 2.435    |
| 4     | 6.536     | 338454    | 26659   | 0.155   | 0.624    |
| 5     | 6.858     | 216059897 | 3996108 | 98.936  | 93.472   |
| 6     | 10.400    | 7003      | 2213    | 0.003   | 0.052    |
| 7     | 10.525    | -159525   | -28     | -0.073  | -0.001   |
| 8     | 17.558    | 0         | 0       | 0.000   | 0.000    |
| 9     | 23.867    | 0         | 0       | 0.000   | 0.000    |
| 10    | 25.500    | 0         | 0       | 0.000   | 0.000    |
| 11    | 31.775    | 0         | 0       | 0.000   | 0.000    |
| 12    | 34.267    | 0         | 0       | 0.000   | 0.000    |
| 13    | 36.950    | 0         | 0       | 0.000   | 0.000    |
| Total |           | 218383013 | 4275182 | 100.000 | 100.000  |

Solvent Impurity  
Methanol  
TEA  
DMF

**Fig. S4:** Calibration curve for methanol analysis

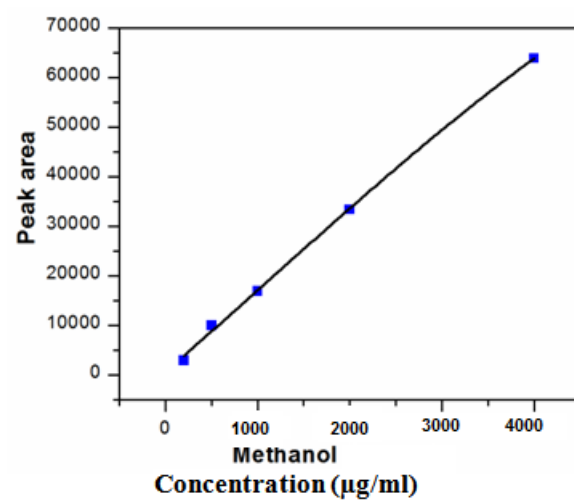

**Fig. S5:** Methanol yield after 24 h of the photoreduction of CO<sub>2</sub> using Cs<sub>2</sub>[Mo<sub>6</sub>Br<sub>8</sub>] cluster as catalyst and CH<sub>3</sub>CN/H<sub>2</sub>O/TEA (3:1:1) as reaction medium.

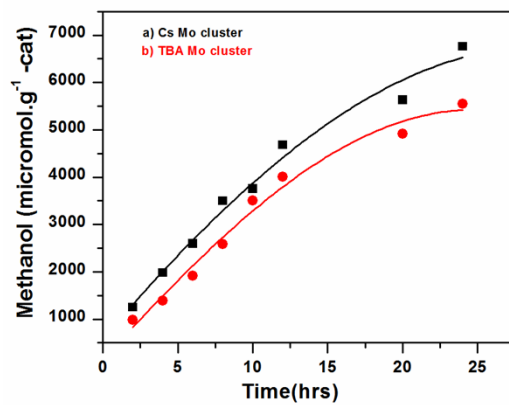

Supplement: c3ra47255h1.pdf [file c3ra47255h1.pdf]
